# Supplementary material for: Lactoferrin Deficiency Promotes Colitis-Associated Colorectal Dysplasia in Mice
Source: PubMed Central journal article supplement (PMC4110006; doi:10.1371/journal.pone.0103298), 2014-07-24
Supplement: pone.0103298.s002.pdf [file pone.0103298.s002.pdf]

**Table S1. Primers used for identification of mouse genotypes by PCR**

| Name    | Sequence of primers         |
|---------|-----------------------------|
| P1      | 5' GGTGCTTACTGCTCACATCG 3'  |
| P2      | 5' AAGCTGCCATGGCAAGGAGA 3'  |
| P3      | 5' GAGGCCCTTGGACTCTGTCTA 3' |
| P4      | 5' TTCAGACACCTCAAGGCTC 3'   |
| Lf1     | 5' TGCCATGACTCTTGATGGTGG 3' |
| Lf2     | 5' CGTAGACTTCAGCTGCCACA 3'  |
| Gadph-F | 5' TCTGACGTGCCGCCTGGAGA 3'  |
| Gadph-R | 5' CAGCCCCGGCATCGAAGGTG 3'  |
