# Supplementary material for: Lactoferrin Deficiency Promotes Colitis-Associated Colorectal Dysplasia in Mice
Source: PubMed Central journal article supplement (PMC4110006; doi:10.1371/journal.pone.0103298), 2014-07-24
Supplement: pone.0103298.s003.pdf [file pone.0103298.s003.pdf]

**Table S2. Primers used for detection of NF- $\kappa$ B target genes by qPCR**

|                                | Forward primers           | Reversed primers         |
|--------------------------------|---------------------------|--------------------------|
| <i>Il-1<math>\beta</math></i>  | AGCCTCGTGCTGTCGGACCC      | TCCAGCTGCAGGGTGGGTGT     |
| <i>Il-6</i>                    | CCTCTCTGCAAGAGACTTCCATCCA | AGCCTCCGACTTGTGAAGTGGT   |
| <i>Cxcl1</i>                   | GCCACCCGCTCGCTTCTCTG      | CAAGGCAAGCCTCGCGACCA     |
| <i>Cox-2</i>                   | GCTGTACAAGCAGTGGCAA       | CCCCAAAGATAGCATCTGGA     |
| <i>Mmp9</i>                    | TGGTGTGCCCTGGA ACTCA      | TGGAAACTCACACGCCAGAAG    |
| <i>Ifn-<math>\gamma</math></i> | ACTGGCAA AAGGATGGTGAC     | GACCTGTGGGTTGTTGACCT     |
| <i>Tnf-<math>\alpha</math></i> | AGGGGCCACCACGCTCTTCT      | CATGCCGTTGGCCAGGAGGG     |
| <i>Mcp-1</i>                   | TCTGGGCCTGCTGTT CACA      | CCTACTCATTGGGATCATCTTGCT |
